# Supplementary material
Source: PubMed Central journal article supplement (PMC5564053)
Supplement: Supp_Table1.pdf [file Supp_Table1.pdf]

SUPPLEMENTARY TABLE S1. LINEAR REGRESSION OF LOG-ALANINE AMINOTRANSFERASE (AS THE OUTCOME), MODELING SEPARATELY AS A FUNCTION OF Z-SCORES OF BLOOD PRESSURE, LOG-TRIGLYCERIDES, HIGH-DENSITY LIPOPROTEIN CHOLESTEROL, AND GLUCOSE (AS PREDICTORS), OVERALL AND BY RACE/ETHNICITY AND GENDER

|                 | N    | <i>HDL Z-score</i>    |          | <i>Glucose Z-score</i> |          | <i>SBP Z-score</i>    |          | <i>Triglycerides Z-score</i> |          |
|-----------------|------|-----------------------|----------|------------------------|----------|-----------------------|----------|------------------------------|----------|
|                 |      | <i>Slope estimate</i> | <i>r</i> | <i>Slope estimate</i>  | <i>r</i> | <i>Slope estimate</i> | <i>r</i> | <i>Slope estimate</i>        | <i>r</i> |
| <b>All</b>      |      |                       |          |                        |          |                       |          |                              |          |
| Overall         | 5019 | -0.07                 | 0.19     | 0.07                   | 0.16     | 0.09                  | 0.23     | 0.09                         | 0.23     |
| Males           | 2635 | -0.07                 | 0.16     | 0.06                   | 0.12     | 0.08                  | 0.21     | 0.11                         | 0.28     |
| Females         | 2384 | -0.04                 | 0.11     | 0.02                   | 0.06     | 0.02                  | 0.07     | 0.06                         | 0.17     |
| <b>NHW</b>      |      |                       |          |                        |          |                       |          |                              |          |
| Overall         | 1472 | -0.06                 | 0.17     | 0.06                   | 0.14     | 0.09                  | 0.24     | 0.08                         | 0.22     |
| Males           | 781  | -0.06                 | 0.15     | 0.04                   | 0.09     | 0.09                  | 0.24     | 0.11                         | 0.29     |
| Females         | 691  | -0.02*                | 0.06     | 0.01*                  | 0.02     | 0.01*                 | 0.03     | 0.03                         | 0.11     |
| <b>NHB</b>      |      |                       |          |                        |          |                       |          |                              |          |
| Overall         | 1532 | -0.05                 | 0.14     | 0.06                   | 0.15     | 0.10                  | 0.28     | 0.07                         | 0.17     |
| Males           | 844  | -0.05                 | 0.13     | 0.06                   | 0.15     | 0.08                  | 0.23     | 0.08                         | 0.20     |
| Females         | 688  | -0.03                 | 0.11     | 0.01*                  | 0.03     | 0.05                  | 0.17     | 0.06                         | 0.15     |
| <b>Hispanic</b> |      |                       |          |                        |          |                       |          |                              |          |
| Overall         | 2015 | -0.10                 | 0.22     | 0.08                   | 0.17     | 0.10                  | 0.22     | 0.11                         | 0.24     |
| Males           | 1010 | -0.10                 | 0.19     | 0.08                   | 0.15     | 0.08                  | 0.16     | 0.12                         | 0.26     |
| Females         | 1005 | -0.08                 | 0.19     | 0.03*                  | 0.09     | 0.07                  | 0.18     | 0.09                         | 0.23     |

\**P*-value >0.05; all other values *P*<0.05.

HDL, high-density lipoprotein; SBP, systolic blood pressure; NHW, non-Hispanic white; NHB, non-Hispanic black.
