# Supplementary material
Source: PubMed Central journal article supplement (PMC5564053)

## Supplementary Data

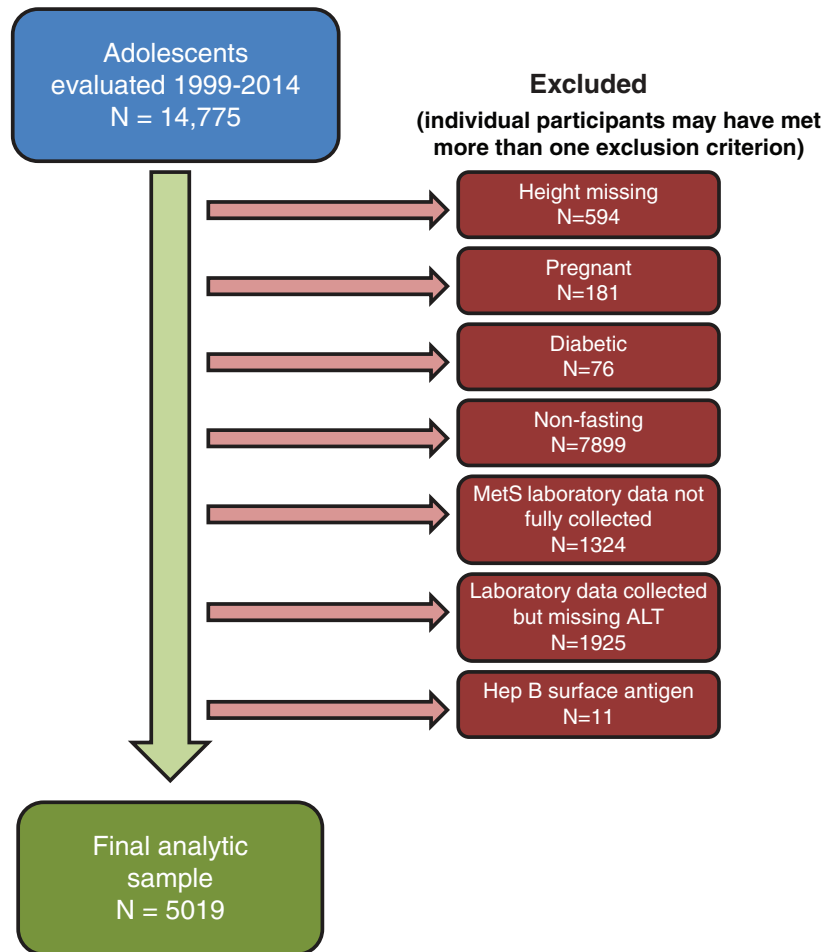

**SUPPLEMENTARY FIG. S1.** Flow diagram of included and excluded participants.

Supplement: Supp_Figure1.pdf [file Supp_Figure1.pdf]
